---

# Erratum

Clement S, Braithwaite SS, Magee MF, Ahmann A, Smith EP, Schafer RG, Hirsch IB, on behalf of the Diabetes in Hospitals Writing Committee: Management of diabetes and hyperglycemia in hospitals (Technical Review). *Diabetes Care* 27:553–591, 2004

In Table 3 of the above-listed article, the 13th bullet under the column labeled “Comments” should read: “Starting dose for perioperative maintenance insulin drip is  $0.02 \text{ units} \cdot \text{kg}^{-1} \cdot \text{h}^{-1}$ ” (instead of  $0.2 \text{ units} \cdot \text{kg}^{-1} \cdot \text{h}^{-1}$ ).
